# Supplementary material for: Analysis of charge trapping and long lived hole generation in SrTiO3 photoanodes
Source: Royal Society of Chemistry journal article supplement (doi:10.1039/d3se00886j), 2023-01-01
Supplement: d3se00886j1.pdf [file d3se00886j1.pdf]

## Analysis of charge trapping and long lived hole generation in SrTiO<sub>3</sub> photoanodes

Anna A. Wilson,<sup>a</sup> Thomas Shalvey,<sup>b</sup> Andreas Kafizas,<sup>a,c</sup> Asim Mumtaz,<sup>d</sup> James R. Durrant<sup>a,e</sup>

<sup>a</sup>Department of Chemistry and Centre for Processable Electronics, Imperial College London, London, W12 0BZ, UK, j.durrant@imperial.ac.uk

<sup>b</sup>Stephenson Institute for Renewable Energy, Department of Physics, University of Liverpool, Liverpool, L69 7ZF, UK

<sup>c</sup>London Centre for Nanotechnology, Imperial College London, SW7 2AZ, UK

<sup>d</sup>School of Physics, Electronics & Technology, University of York, Heslington, York, YO10 5DD, UK

<sup>e</sup>SPECIFIC IKC, College of Engineering, Swansea University, Swansea, SA2 7AX, UK

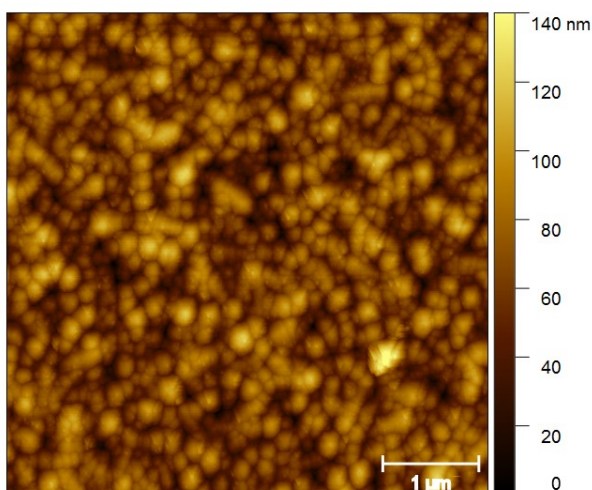

**Figure S1:** 2D AFM image of the SrTiO<sub>3</sub> surface. The surface is relatively flat with a roughness factor of 1.1, calculated by dividing the actual surface area (27.3 μm<sup>2</sup>) by the projected surface area (25.0 μm<sup>2</sup>).

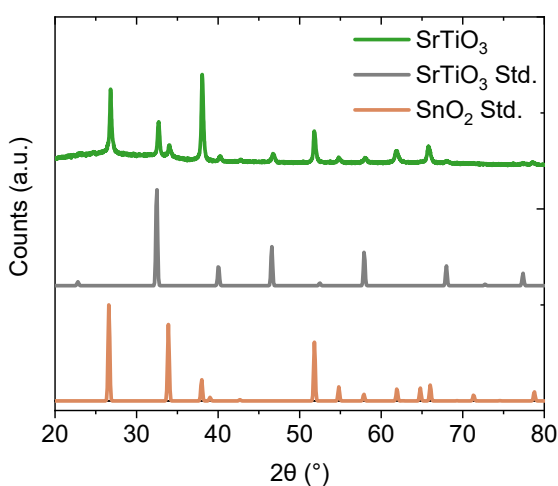

**Figure S2:** XRD pattern of the SrTiO<sub>3</sub> on FTO (F-doped SnO<sub>2</sub>) investigated in this work, compared to standard XRD patterns of SrTiO<sub>3</sub> (ICDS collection no: 23076) and SnO<sub>2</sub> (ICDS collection no: 9163).

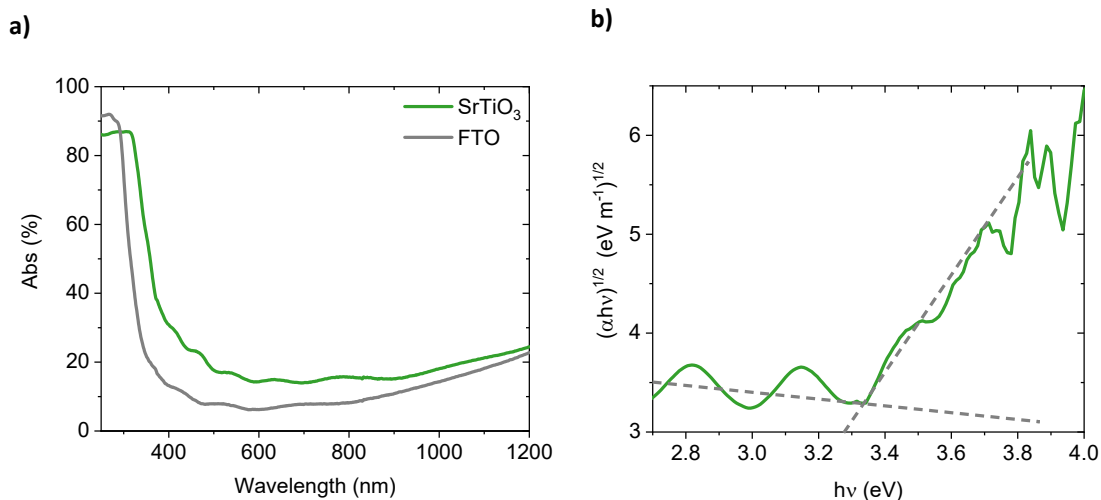

**Figure S3:** Steady-state spectra of SrTiO<sub>3</sub>/FTO compared to FTO, a) the absorbance, and b) Tauc plot giving an estimated band gap of 3.3-3.4 eV. It is noted that due to the large degree of noise this is an approximate value.

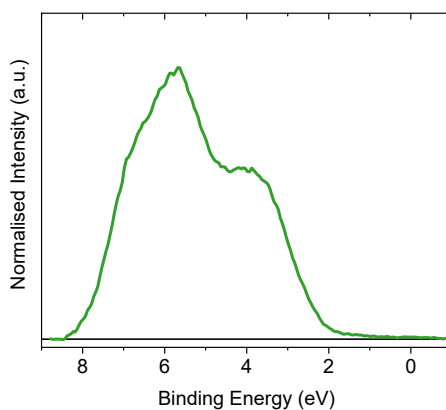

**Figure S4:** XPS of the valence band energy region of the SrTiO<sub>3</sub> photoanode.

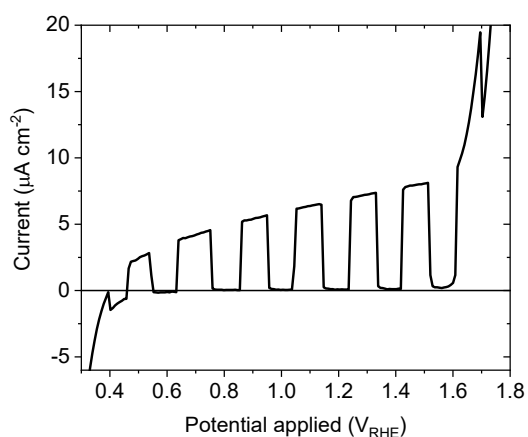

**Figure S5:** Chopped light J-V response of SrTiO<sub>3</sub>, measured using illumination from a 365 nm LED at approximately 1 sun illumination intensity (2.8 mW cm<sup>-2</sup>).

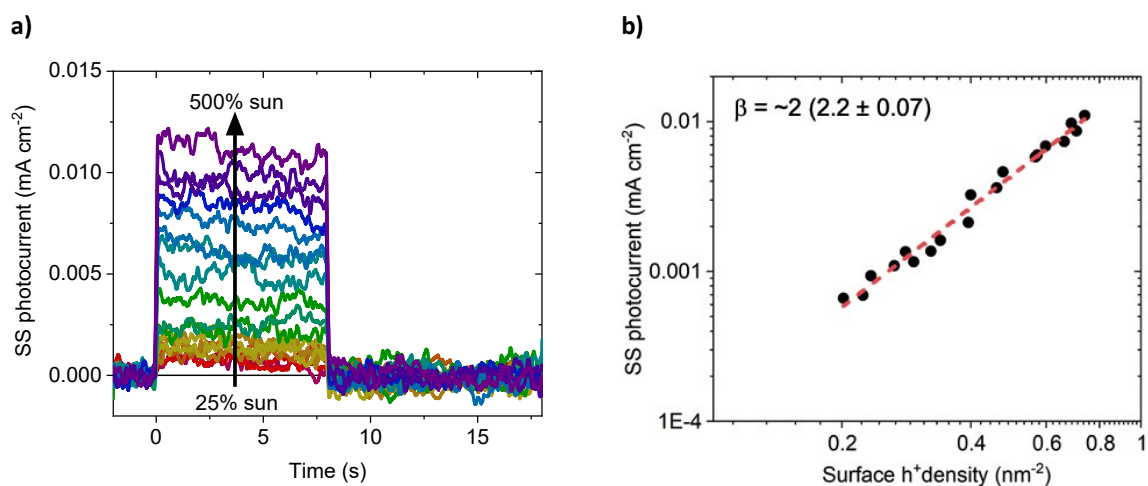

**Figure S6:** Measurements undertaken under an applied bias of  $1.3 V_{RHE}$  and with increasing LED excitation intensities. a) Steady-state TPC measurements. b) Rate law analysis plot of the steady-state photocurrent (taken from the TPC in b)) measured simultaneously with the steady-state optical hole signal (taken from the PIAS in a)). The steady-state optical hole signal was converted into a surface  $h^+$  using the calculated extinction coefficient of  $2200 M^{-1} cm^{-1}$ . The gradient of two for the linear suggests a second order reaction with respect to the hole density.

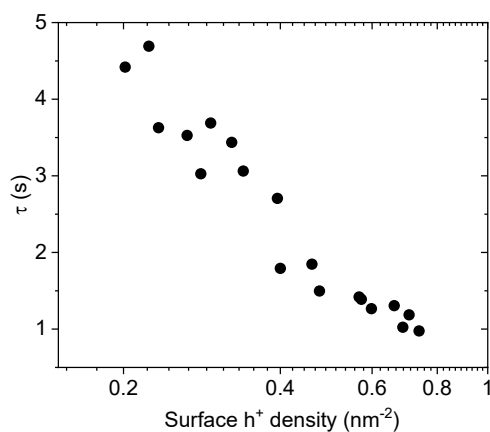

**Figure S7:** Calculated reaction time constant,  $\tau$ , of hole species in SrTiO<sub>3</sub> on FTO at a range of hole densities. Undertaken under an applied bias of  $1.3 V_{RHE}$ .
